# Supplementary material for: Implementing an EMR-based Health-related Social Needs Screen in a Pediatric Hospital System
Source: PubMed Central journal article supplement — Pediatr Qual Saf. 2022 Jan 21;7(1):e512. doi: 10.1097/pq9.0000000000000512 (PMC8782109; doi:10.1097/pq9.0000000000000512), 2022-01-21
Supplement: pqs-7-e512-s001.pdf [file pqs-7-e512-s001.pdf]

### Flow Map of HRSN Screening Process

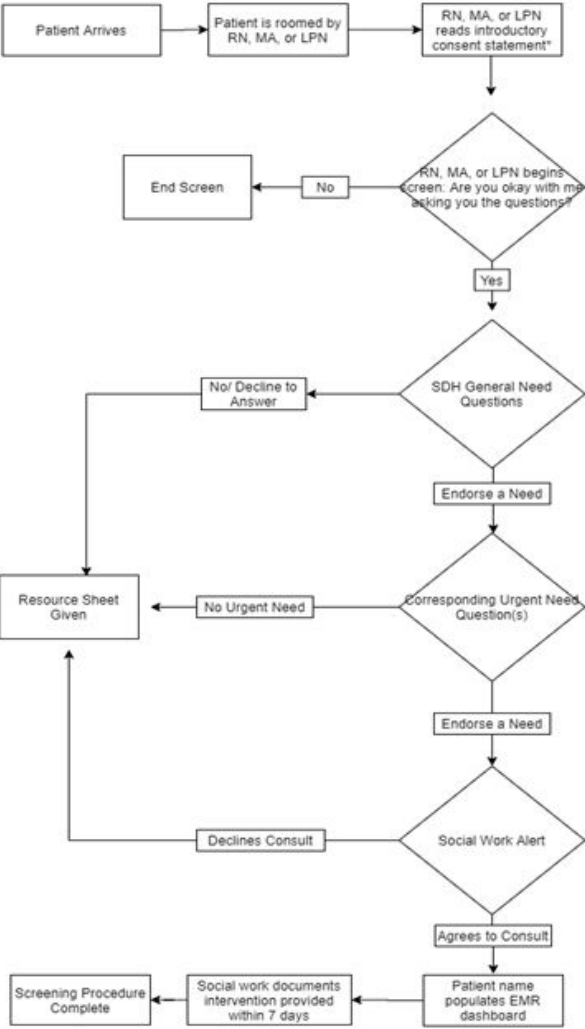

\*We are asking all patients four questions about social needs that may impact health. If you chose to answer and your needs are urgent, someone from our team may talk to you about resources.\*
